# Supplementary material for: Comprehensive portrait of recurrent glioblastoma multiforme in molecular and clinical characteristics
Source: PubMed Central journal article supplement (PMC4741581; doi:10.18632/oncotarget.5038), 2015-09-04
Supplement: oncotarget-06-30968-s001.pdf [file oncotarget-06-30968-s001.pdf]

**SUPPLEMENTARY TABLE****Supplementary Table S1: Gene sets (TOP 20) enriched in recurrent GBM**

|    | NAME                                                 | ES    | NES   | NOM <i>p</i> -val |
|----|------------------------------------------------------|-------|-------|-------------------|
| 1  | DNA_DAMAGE_RESPONSE SIGNAL_TRANSDUCTION              | -0.51 | -1.89 | 0.000             |
| 2  | MICROTUBULE_CYTOSKELETON_ORGANIZATION_AND_BIOGENESIS | -0.50 | -1.84 | 0.000             |
| 3  | HETEROCYCLE_METABOLIC_PROCESS                        | -0.52 | -1.79 | 0.004             |
| 4  | REGULATION_OF_MUSCLE_CONTRACTION                     | -0.57 | -1.78 | 0.006             |
| 5  | REGULATION_OF_CELL_ADHESION                          | -0.48 | -1.76 | 0.006             |
| 6  | LOCOMOTORY_BEHAVIOR                                  | -0.38 | -1.75 | 0.000             |
| 7  | BEHAVIOR                                             | -0.34 | -1.68 | 0.000             |
| 8  | DNA_DAMAGE_CHECKPOINT                                | -0.52 | -1.67 | 0.010             |
| 9  | SULFUR_COMPOUND_BIOSYNTHETIC_PROCESS                 | -0.54 | -1.64 | 0.026             |
| 10 | DNA_INTEGRITY_CHECKPOINT                             | -0.48 | -1.60 | 0.018             |
| 11 | ENDOSOME_TRANSPORT                                   | -0.49 | -1.59 | 0.025             |
| 12 | ESTABLISHMENT_AND_OR_MAINTENANCE_OF_CELL_POLARITY    | -0.51 | -1.59 | 0.024             |
| 13 | REGULATION_OF_ENDOCYTOSIS                            | -0.52 | -1.59 | 0.014             |
| 14 | MICROTUBULE_BASED_PROCESS                            | -0.36 | -1.59 | 0.004             |
| 15 | CHROMOSOME_SEGREGATION                               | -0.44 | -1.58 | 0.013             |
| 16 | CELLULAR_PROTEIN_CATABOLIC_PROCESS                   | -0.38 | -1.56 | 0.010             |
| 17 | ENERGY_RESERVE_METABOLIC_PROCESS                     | -0.53 | -1.56 | 0.042             |
| 18 | RESPONSE_TO_ORGANIC_SUBSTANCE                        | -0.44 | -1.55 | 0.021             |
| 19 | REGULATION_OF_DNA_METABOLIC_PROCESS                  | -0.39 | -1.54 | 0.006             |
| 20 | POTASSIUM_ION_TRANSPORT                              | -0.37 | -1.52 | 0.021             |
